# Supplementary material for: Bend, don't break: exploring the mechanochromic, AIE and nonlinear optical properties of carbazole–thiobarbituric acid hybrids
Source: Royal Society of Chemistry journal article supplement (doi:10.1039/d4tc04402a), 2025-01-01
Supplement: d4tc04402a1.pdf [file d4tc04402a1.pdf]

## Supplementary Information

# Bend, Don't Break: Exploring the Mechanochromic, AIE and Non-Linear Optical Properties of Carbazole-Thiobarbituric Acid Hybrids.

Meema Rasheed,<sup>a</sup> R Lakshmi,<sup>b</sup> Parvathy O.C.,<sup>a</sup> Shandev P.P.,<sup>a</sup> Pramod Gopinath,<sup>\*b, c</sup>  
Narayanapillai Manoj,<sup>\*a, c</sup>

<sup>a</sup> Department of Applied Chemistry, Cochin University of Science and Technology, Kochi 682022, Kerala, India

<sup>b</sup> International School of Photonics, Cochin University of Science and Technology, Kochi 682022, Kerala, India

<sup>c</sup> Inter University Centre for Nanomaterials and Devices, Cochin University of Science and Technology, Kochi-682022, Kerala, India

E-mail: [manoj.n@cusat.ac.in](mailto:manoj.n@cusat.ac.in), [pramod@cusat.ac.in](mailto:pramod@cusat.ac.in)

### Table of Contents

|                                                             |            |
|-------------------------------------------------------------|------------|
| <b>1. Experimental procedures.....</b>                      | <b>S2</b>  |
| <b>2. Characterisation of TBA conjugates.....</b>           | <b>S2</b>  |
| <b>3. Global reactivity parameters.....</b>                 | <b>S3</b>  |
| <b>4. Theoretical Calculations.....</b>                     | <b>S4</b>  |
| <b>5. Nonlinear Optical Property.....</b>                   | <b>S5</b>  |
| <b>6. UV-Visible Absorption Properties.....</b>             | <b>S6</b>  |
| <b>7. Morphology of Aggregates.....</b>                     | <b>S7</b>  |
| <b>8. Dynamic Light Scattering Studies.....</b>             | <b>S7</b>  |
| <b>9. Mechanofluorochromic Properties.....</b>              | <b>S9</b>  |
| <b>10. <sup>1</sup>H-NMR spectra of TBA conjugates.....</b> | <b>S11</b> |

## 1. Experimental Procedures

### Synthesis of 5-((9-alkyl-9H-carbazol-3-yl) methylene)-2-thioxodihydropyrimidine-4,6(1H,5H)-dione\_(TBA conjugate)

*N*-alkylcarbazole-thiobarbituric acid conjugates were synthesized via Knoevenagel condensation.<sup>1</sup> 9-alkyl-9H-carbazole-3-carbaldehyde (1 eqv.) and thiobarbituric acid (1 eqv.) were reacted in ethanol at 60°C for 5 hours. The resulting precipitated TBA conjugate was filtered, washed with hot water, and dried under vacuum. The reaction yielded 80% of the desired product.

## 2. Results and discussion

### Characterisation of TBA conjugates

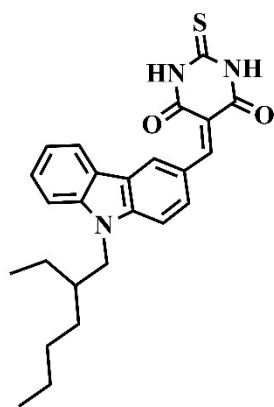

**ETBA:** m.p. > 250 °C, FT-IR (KBr,  $\nu_{\max}$   $\text{cm}^{-1}$ ): 3436, 3140, 2352, 1642, 1533.  $^1\text{H NMR}$  (400 MHz,  $\text{CDCl}_3$ ,  $\delta$  ppm) 0.85 (t, 3H), 0.92 (t, 3H), 1.22 – 1.42 (m, 9H), 4.2 (d, 2H), 7.30 – 7.46 (m, 4H), 7.50 – 7.56 (m, 1H), 8.37 (d, 1H), 8.59 (d, 1H), 8.76 (s, 1H), 8.93 (d, 1H), 9.36 (s, 1H). **MALDI-TOF MS** (ESI MS)  $m/z$ :  $[\text{M}+\text{H}]^+$  calcd for  $\text{C}_{25}\text{H}_{27}\text{N}_3\text{O}_2\text{S}$  434.1902, found 434.9803.

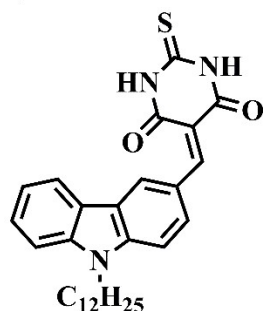

**DTBA:** m.p. >250 °C, FT-IR (KBr,  $\nu_{\max}$   $\text{cm}^{-1}$ ): 3426, 3120, 2362, 1646, 1533.  $^1\text{H NMR}$  (400 MHz,  $\text{DMSO}-d_6$ ,  $\delta$  ppm) 0.83 (t, 3H), 1.16 – 1.26 (m, 18H), 1.78 – 1.84 (m, 2H), 4.48 (t, 2H), 7.34 (t, 1H), 7.55 (t, 1H), 8.21 (d, 1H), 8.56 (s, 1H), 8.66 – 8.68 (m, 1H), 9.36 (s, 1H), 12.29 (s, 1H), 12.38 (s, 1H). **MALDI-TOF MS** (ESI MS)  $m/z$ :  $[\text{M}+\text{H}]^+$  calcd for  $\text{C}_{29}\text{H}_{36}\text{N}_3\text{O}_2\text{S}$  490.2523, found 490.7923.

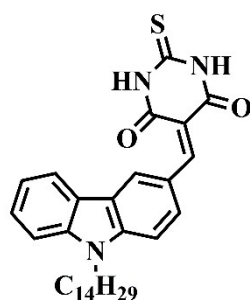

**TTBA:** m.p. > 250 °C, FT-IR (KBr,  $\nu_{\max}$   $\text{cm}^{-1}$ ): 3420, 3156, 2350, 1654, 1517.  $^1\text{H NMR}$  (400 MHz,  $\text{CDCl}_3$ ,  $\delta$  ppm) 0.86 (t, 3H), 1.22 – 1.41 (m, 20H), 1.71 (s, 2H), 1.89 (t, 2H), 4.33 (t, 2H), 7.38 (m, 1H), 7.43 – 7.46 (m, 2H), 7.51 – 7.56 (m, 1H), 8.27 (d, 1H), 8.58 (d, 1H), 8.76 (s, 1H), 8.90 (d, 2H), 9.37 (s, 1H). **MALDI-TOF MS** (ESI MS)  $m/z$ :  $[\text{M}+\text{H}]^+$  calcd for  $\text{C}_{31}\text{H}_{39}\text{N}_3\text{O}_2\text{S}$  518.2841, found 518.5560

## Global-Reactivity Parameters

Valuable theoretical understanding of chemical reactivity and selectivity parameters by examining fundamental qualitative chemical concepts such as ionisation potential (IP), electron affinity (EA), electronegativity ( $\chi$ ), chemical potential ( $\mu$ ), global hardness ( $\eta$ ), softness ( $\sigma$ ), and electrophilicity index ( $\omega$ ). Molecules with higher chemical potential ( $\mu$ ) and hardness ( $\eta$ ) values are considered to be kinetically stable. These parameters are directly associated with orbital  $E_{\text{gap}}$  values and are inversely correlated with overall softness ( $\sigma$ ). Additionally, GRPs can be calculated using equations 1 and 2.

$$\text{IP} = -E_{\text{HOMO}} \quad (1)$$

$$\text{EA} = -E_{\text{LUMO}} \quad (2)$$

IP and EA are the ionisation potential and electron affinity (in a.u.). Electronegativity ( $\chi$ ), chemical hardness ( $\eta$ ), and chemical potential ( $\mu$ ) have been determined using the Koopmans theorem with equations 3-5.

$$\chi = \frac{[\text{IP} + \text{EA}]}{2} = -\frac{[E_{\text{LUMO}} + E_{\text{HOMO}}]}{2} \quad (3)$$

$$\eta = \frac{[\text{IP} - \text{EA}]}{2} = -\frac{[E_{\text{LUMO}} - E_{\text{HOMO}}]}{2} \quad (4)$$

$$\mu = \frac{E_{\text{HOMO}} + E_{\text{LUMO}}}{2} \quad (5)$$

Equations 6 and 7 give the global softness ( $\sigma$ ) and electrophilicity index ( $\omega$ )

$$\sigma = \frac{1}{2\eta} \quad (6)$$

$$\omega = \frac{\mu^2}{2\eta} \quad (7)$$

|      | IP     | EA     | $\chi$ | $\eta$ | $\mu$   | $\sigma$ | $\omega$ |
|------|--------|--------|--------|--------|---------|----------|----------|
| ETBA | 0.2235 | 0.1054 | 0.1644 | 0.0590 | -0.1644 | 8.4745   | 0.2290   |
| DTBA | 0.2234 | 0.1051 | 0.1642 | 0.0591 | -0.1642 | 8.4602   | 0.2281   |
| TTBA | 0.2233 | 0.1051 | 0.1642 | 0.0591 | -0.1642 | 8.4602   | 0.2281   |

**Table 1.** Global reactivity parameters of ETBA, DTBA and TTBA.

## Theoretical calculations

Previous research revealed the similar molecule's twisted intramolecular charge transfer (TICT) state.<sup>2</sup> This conclusion was based on Lippert-Mataga analysis and excited-state DFT calculations. The presence of a TICT state explains the observed red shift in emission spectra in polar solvents.

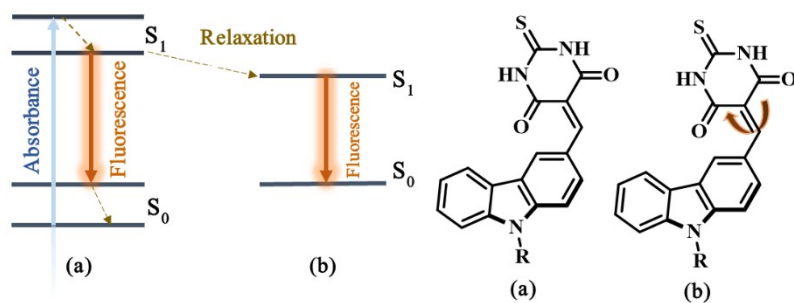

**Fig. 1** Diagram showing emission in TICT state of TBA conjugates in (a) Planar and (b) when excited, these molecules can twist, leading to a unique emission profile.

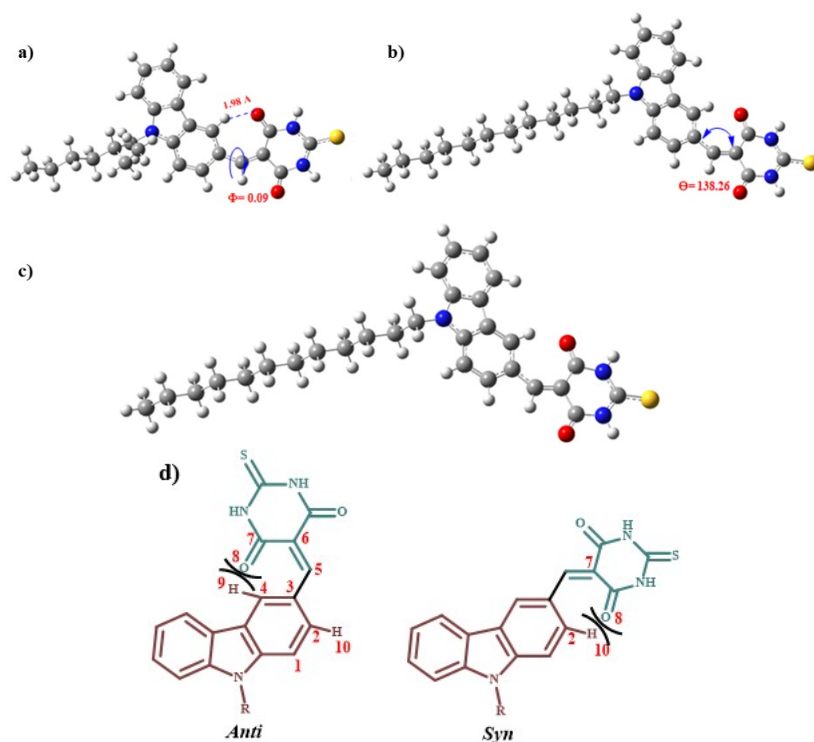

**Chart. 1** Optimized ground state geometry of a) ETBA, b) DTBA, c) TTBA in gaseous state, d) *Anti* and *Syn* conformations of TBA conjugates

## Non-Linear Optical property

### Theoretical evaluation

To understand how TBA conjugates behave optically in water and THF, we used DFT methods with B3LYP and a 6-311++G(d,p) basis set to calculate their static dipole moment ( $\mu_{total}$ ), total polarizability ( $\alpha_{tot}$ ), polarizability anisotropy ( $\Delta\alpha$ ), static first-order hyperpolarizability ( $\beta_{total}$ ), and second-order hyperpolarizability ( $\gamma$ ). We assumed the molecules are in a static external electric field  $F$ , and their energy is expressed as the function of the static field  $F$ ,<sup>3</sup> as shown in equation 8.

$$E(F) = E(0) - \mu_i F_i - \frac{1}{2} \alpha_{ij} F_i F_j - \frac{1}{6} \beta_{ijk} F_i F_j F_k - \frac{1}{24} \gamma_{ijkl} F_i F_j F_k F_l \quad (8)$$

The total static dipole moment ( $\mu_{tot}$ ) is determined by using this equation<sup>4,5</sup>:  $\mu_{tot} = \sum \mu_i$

$$\mu_i = (\mu_x^2 + \mu_y^2 + \mu_z^2)^{1/2} \quad (9)$$

A second-rank tensor describes the polarizability; the mean or total polarizability ( $\alpha_{tot}$ ) can be determined by solely considering the diagonal elements, as follows:<sup>4,5</sup>

$$\alpha_{ij} = \frac{(\alpha_{xx} + \alpha_{yy} + \alpha_{zz})}{3} \quad (10)$$

The anisotropy of the polarizability  $\Delta\alpha$  can be expressed as<sup>6,7</sup>

$$\Delta\alpha = \frac{1}{\sqrt{2}} \sqrt{[(\alpha_{xx} - \alpha_{yy})^2 + (\alpha_{yy} - \alpha_{zz})^2 + (\alpha_{zz} - \alpha_{xx})^2 + 6(\alpha_{xy}^2 + \alpha_{yz}^2 + \alpha_{xz}^2)]} \quad (11)$$

A third-rank tensor represents the static first-order hyperpolarizability ( $\beta_{tot}$ ). The 27 components of the 3D matrix can be reduced to 10 elements by Kleinman symmetry.<sup>8</sup> The output file from Gaussian 03W provides the following main components:  $\beta_{xxx}$ ,  $\beta_{xyy}$ ,  $\beta_{xzz}$ ,  $\beta_{yyy}$ ,  $\beta_{yyz}$ ,  $\beta_{yzz}$ ,  $\beta_{zzz}$ ,  $\beta_{xxy}$ ,  $\beta_{xyx}$ ,  $\beta_{yyx}$ ,  $\beta_{yxy}$ ,  $\beta_{zxx}$ ,  $\beta_{xzx}$ ,  $\beta_{zzx}$ ,  $\beta_{xzz}$ ,  $\beta_{yzz}$ ,  $\beta_{zzz}$ . The first hyperpolarizability ( $\beta_{tot}$ ) is defined as equation 12.<sup>6,9</sup>

$$\beta_{ijk} = \sqrt{(\beta_{xxx} + \beta_{xyy} + \beta_{xzz})^2 + (\beta_{xxy} + \beta_{yyx} + \beta_{yzz})^2 + (\beta_{xxz} + \beta_{zyy} + \beta_{zzz})^2} \quad (12)$$

The average value of the static hyperpolarizability of the second order ( $\gamma_{tot}$ ) is given by equation 13,<sup>10</sup>

$$\gamma_{ijk} = \frac{1}{5} [\gamma_{xxxx} + \gamma_{yyyy} + \gamma_{zzzz} + 2(\gamma_{xxyy} + \gamma_{yyzz} + \gamma_{xxzz})] \quad (13)$$

Organic molecules with NLO behaviour are believed to result from strong ICT character, which allows for the transfer of electron density from donor to acceptor along a  $\pi$  bridge.<sup>11</sup> The organic molecule urea is commonly used as a reference material for comparing NLO properties. The  $\beta_{tot}$  value for urea is  $37.28 \times 10^{-32}$  esu,<sup>12</sup> while the  $\beta_{tot}$  values for our synthesised D- $\pi$ -A conjugates are notably higher. This indicates that ETBA, DTBA, and TTBA are favourable candidates for NLO applications. ETBA exhibits high values of  $\beta_{tot}$  and  $\gamma$  in water and THF due to its strong ICT character,<sup>13</sup> leading to enhanced nonlinearity compared to other D- $\pi$ -A conjugates.

## UV-Visible absorption properties

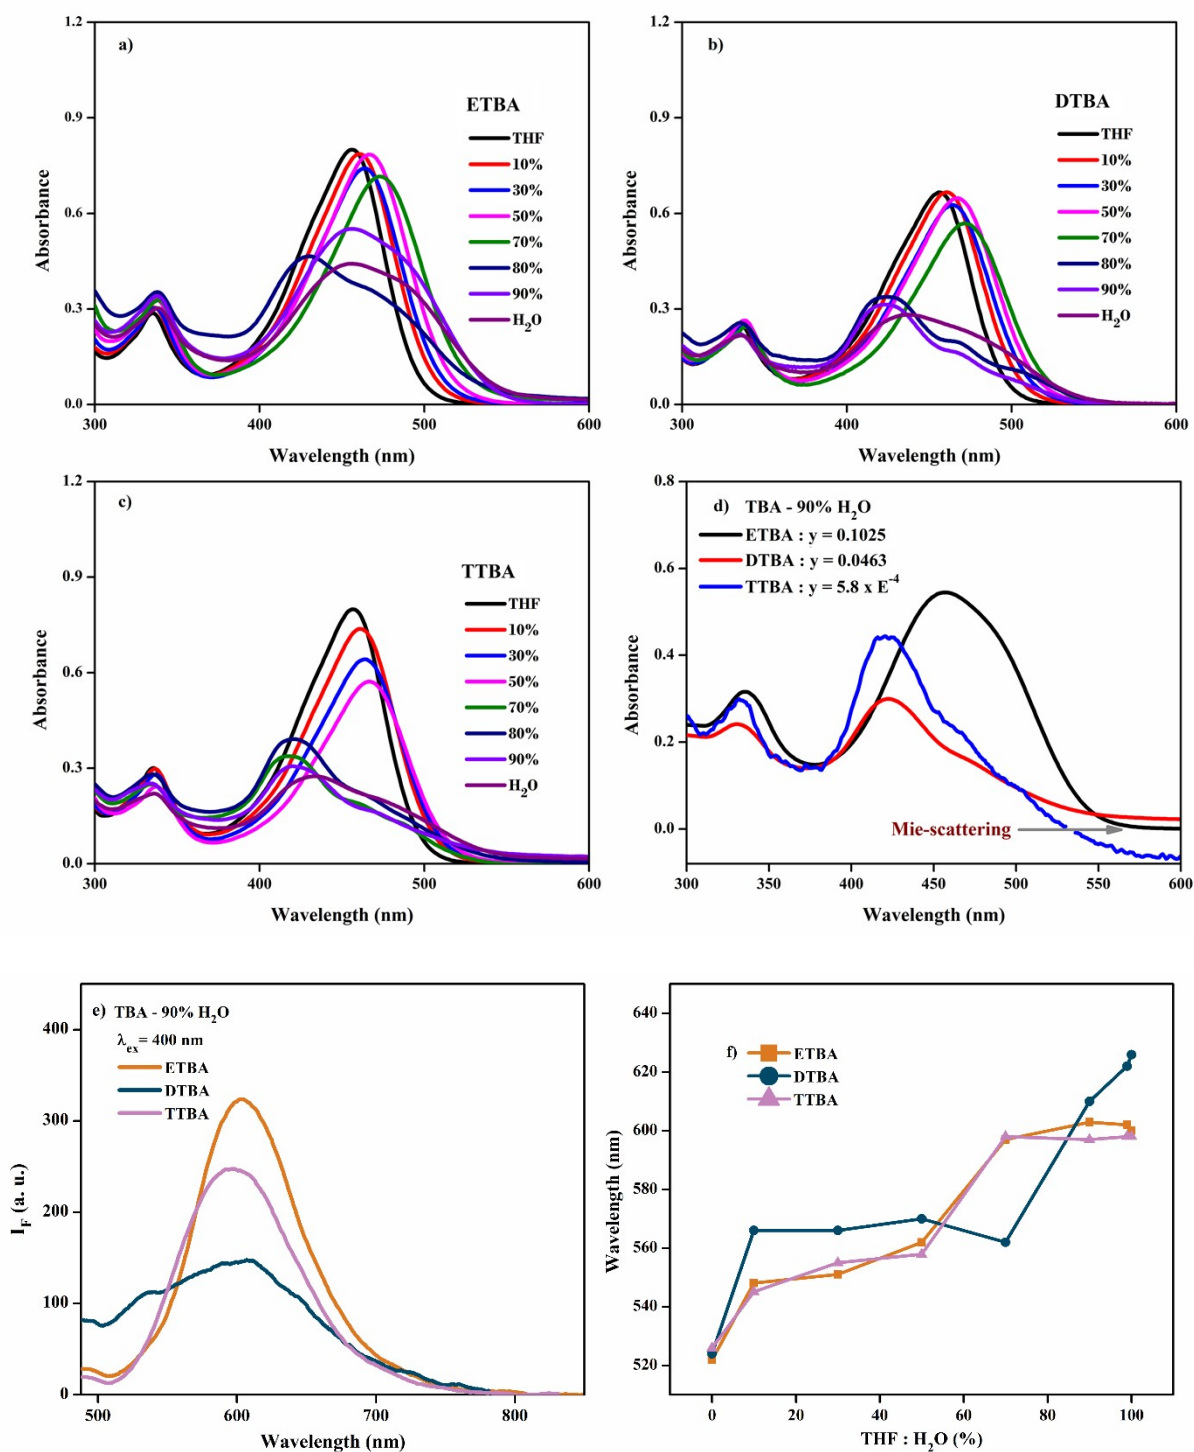

**Fig. 2** Absorption spectra of (a) ETBA, (b) DTBA, (c) TTBA in ( $2 \times 10^{-3}$  M) THF: H<sub>2</sub>O ratios, (d) TBA conjugates in  $f_w = 90\%$  and emission spectra, (e) at  $f_w = 90\%$ , (f) plot of  $\lambda_{max}$  vs. THF: H<sub>2</sub>O (%) ratios.

### Morphology studies of TBA conjugates

Fig. 3 shows the TEM morphology image of the TBA conjugates, where nanorods having uniform diameters with flat and smooth surfaces were seen in ETBA (a,b) and TTBA (e,f). In DTBA (c,d), a sheet-like structure that winds up to form a fibre bundle was observed.

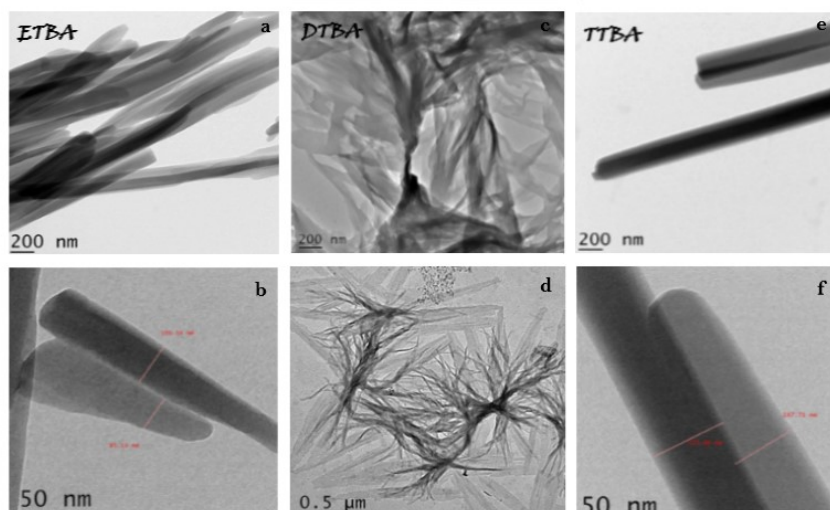

**Fig. 3** TEM images of the self-assembled structures of ETBA (a, b), DTBA (c,d), and TTBA (e,f).

### Aggregate size Measurement

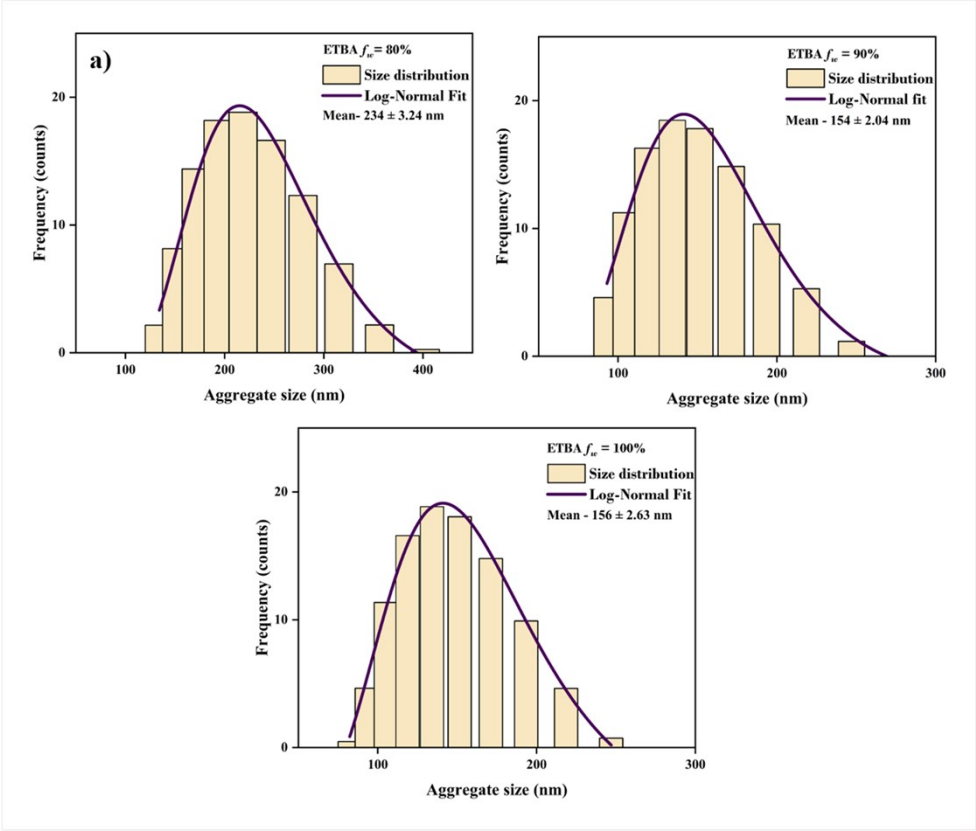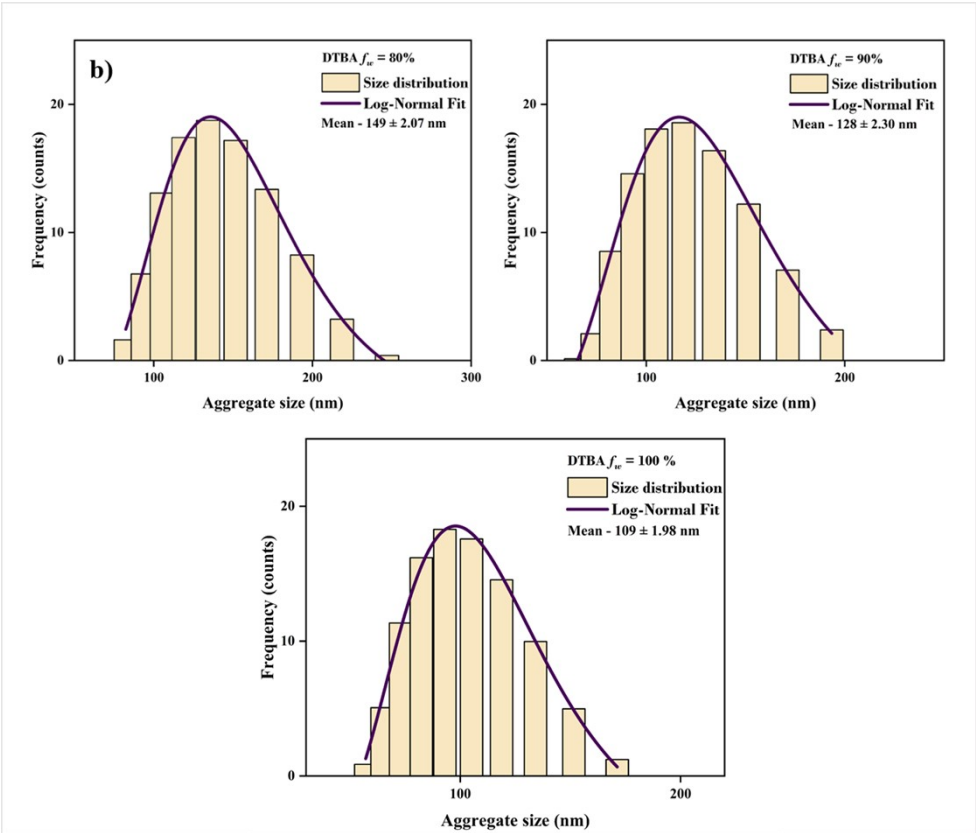



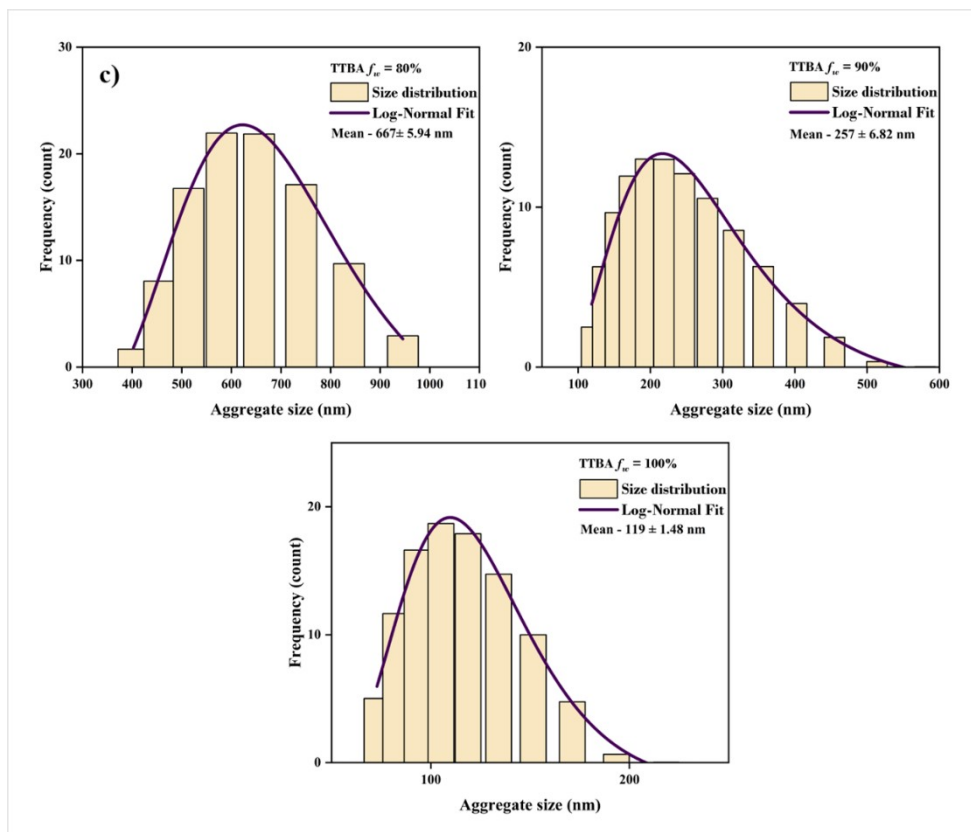

**Fig. 4** Particle size histograms obtained from the DLS analysis for (a) ETBA, (b) DTBA and (c) TTBA, at  $f_w=80\%$ ,  $90\%$  and  $100\%$  and the fits of the data according to a log-normal distribution (Concentration:  $2 \times 10^{-3}$  mol/L).

### Mechanofluorochromic properties

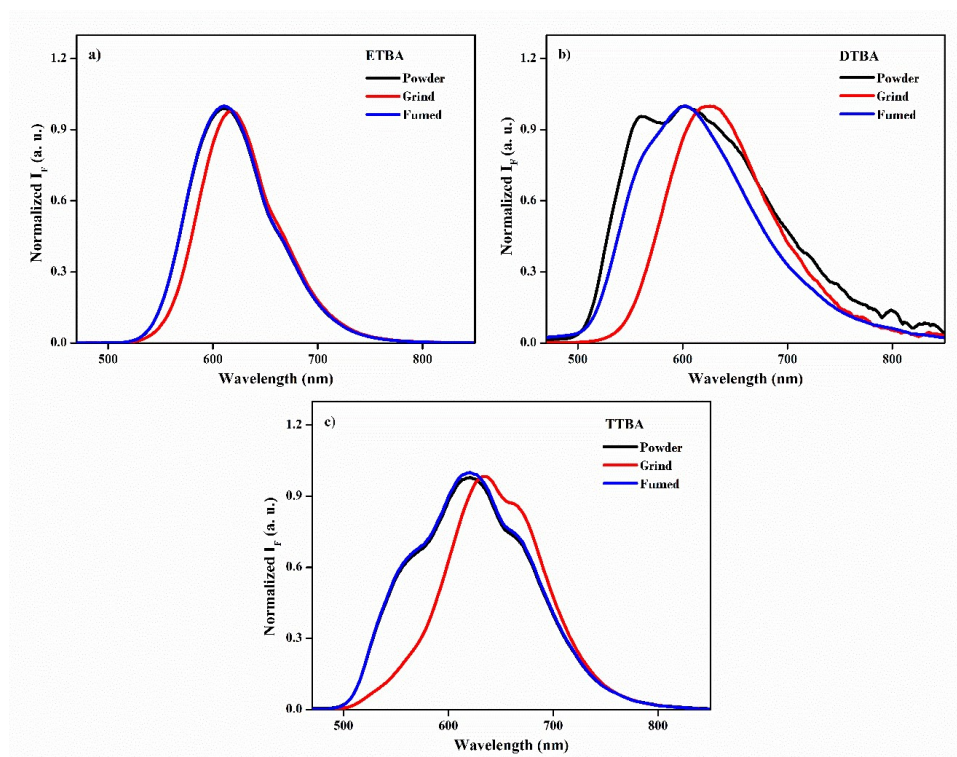

**Fig. 5** Normalized emission spectra ( $\lambda_{ex} = 450$  nm) of TBA Conjugates under external stimuli, showing the grinding-induced spectral shift ( $\Delta\lambda$ ).

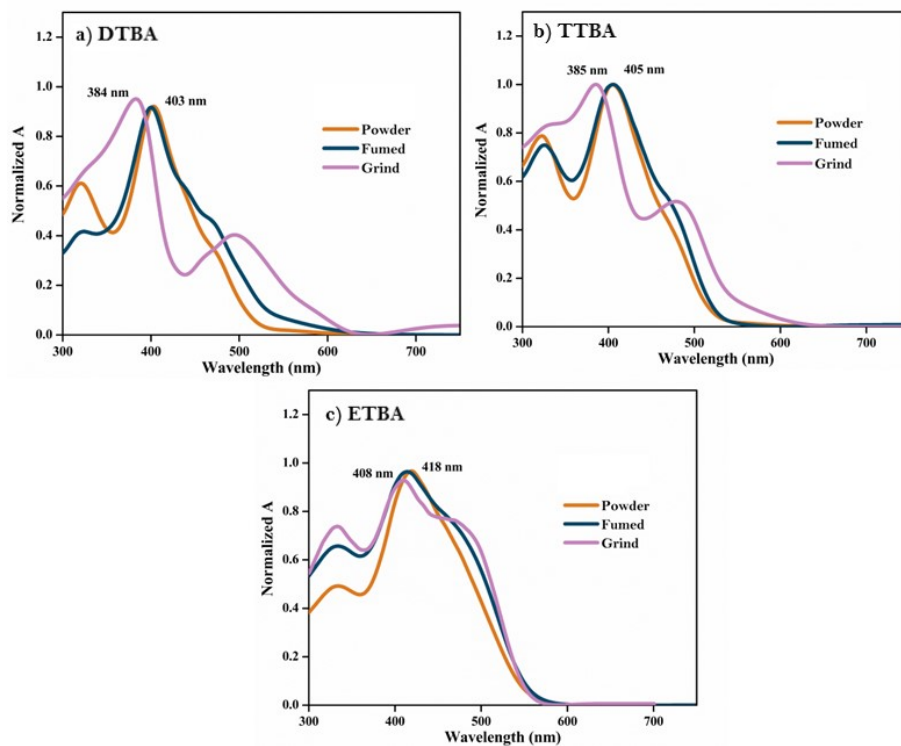

**Fig. 5.1** UV-DRS spectra of TBA Conjugates under external stimuli, showing the grinding-induced spectral shift ( $\Delta\lambda$ ).

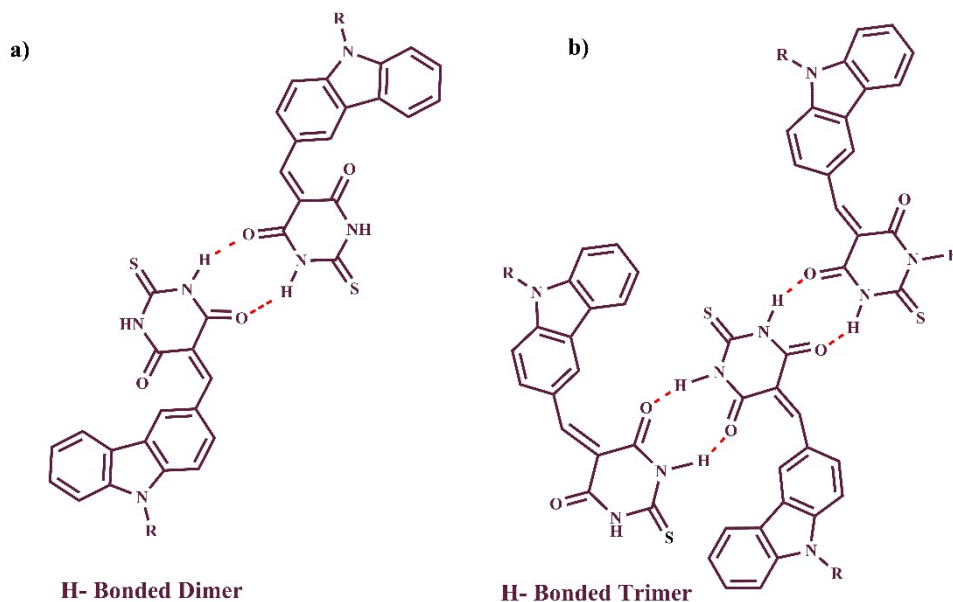

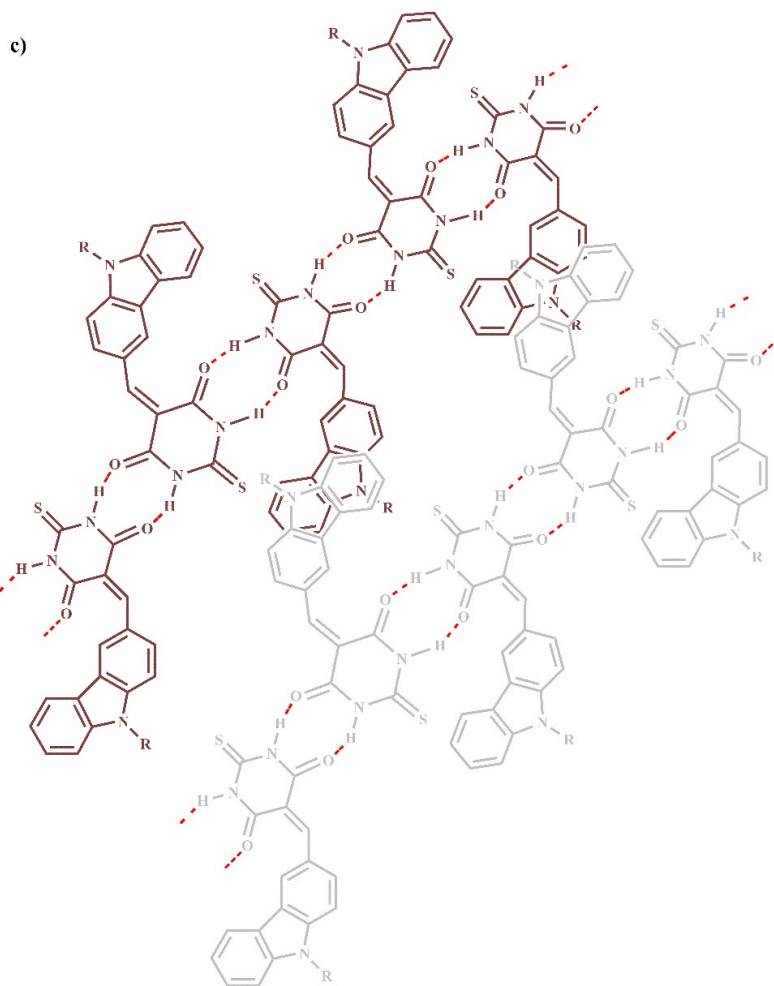

**Scheme 2.** Hydrogen-bonded dimers and trimers of TBA conjugates. H-bonding,  $\pi$ -stacking, and hydrophobic association assisted hierarchical assemblies of TBA conjugates in solution.

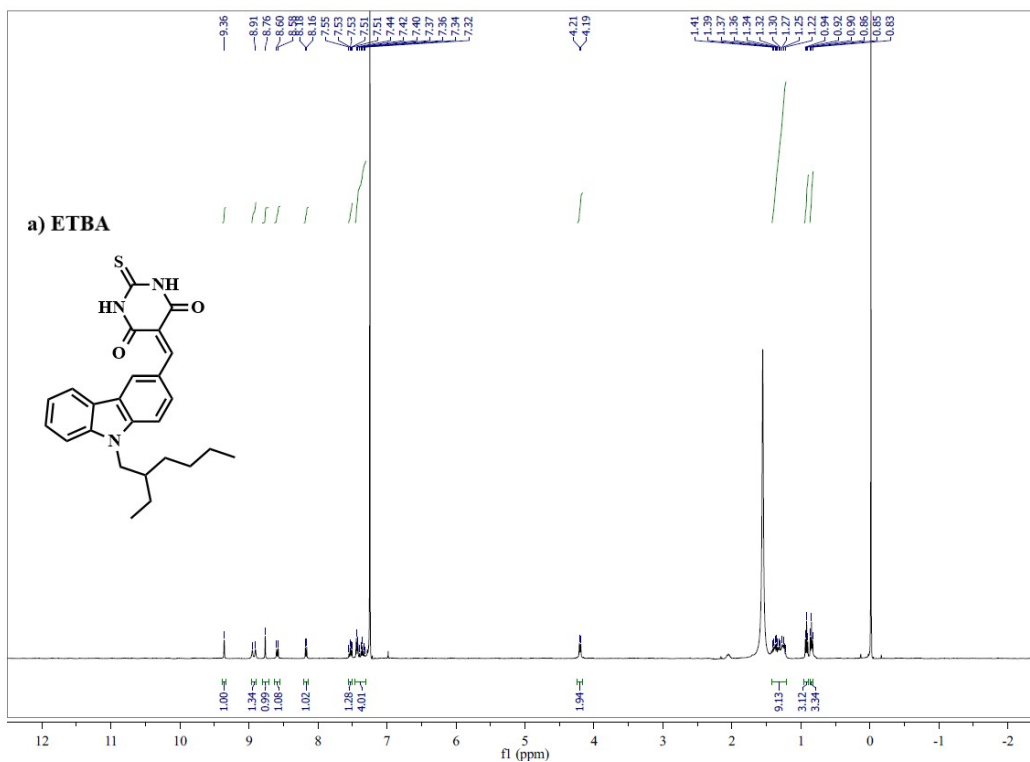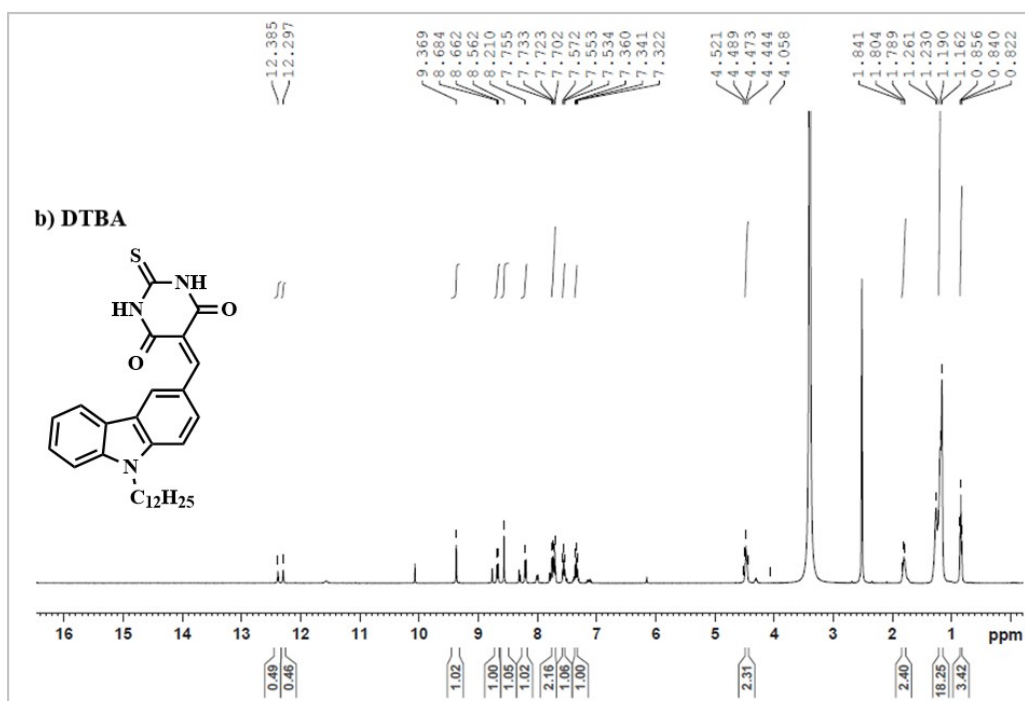

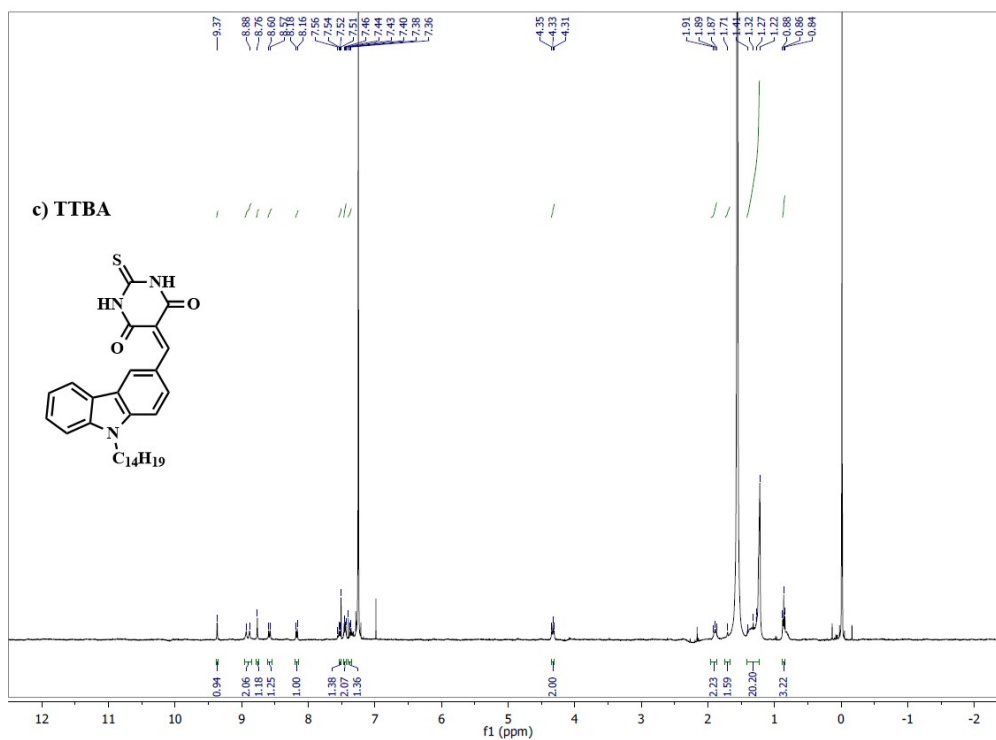

**Fig. 6**  $^1\text{H-NMR}$  spectra of a) ETBA, c) TTBA IN  $\text{CDCl}_3$  and b) DTBA in DMSO at 400 MHz.

## References

1. K. Kala, P. K. Vineetha and N. Manoj, *New J. Chem.*, 2017, 41, 5176–5181.
2. Kala, K. *Ph. D. Thesis, CUSAT. 2016*
3. S. Udayan, A.C. Kuriakose, P. Mary, D. Sherin, T. Manojkumar, V. Nampoori and S. Thomas, *Spectrochim. Acta Part A Mol. Biomol. Spectrosc.*, 2022, 272, 121011.
4. N. Sundaraganesan, J. Karpagam, S. Sebastian and J. P. Cornard, *Spectrochim. Acta Part A: Mol. Biomol. Spectrosc.*, 2009, 73, 11–19.
5. R. Zhang, B. Du, G. Sun and Y. Sun, *Spectrochim. Acta Part A: Mol. Biomol. Spectrosc.*, 2010, 75, 1115–1124.
6. N. Islam and I. H. Lone, *Front. Chem.*, 2017, 5, 11.
7. D. S. Sabirov, *RSC Adv.*, 2014, 4, 44996–45028.
8. S. Cabuk, *Cent. Eur. J. Phys.*, 2012, 10, 239–252.
9. K. S. Thanthiriwatte and K. N. De Silva, *J. Mol. Struct. THEOCHEM*, 2002, 617, 169–175.
10. H. A. Kurtz, J. J. Stewart and K. M. Dieter, *J. Comput. Chem.*, 1990, 11, 82–87.
11. M. U. Khan, M. Ibrahim, M. Khalid, A.A.C. Braga, S. Ahmed and A. Sultan, *J. Clust. Sci.*, 2019, 30, 415–430.
12. B. Raaghul, M.R. Kannan and T. Vijayakumar, *IOP Conf. Ser. Mater. Sci. Eng.*, 2022, 1219, 012035.
13. P.K. Vineetha, A. Aswathy, E. Shiju, K. Chandrasekharan and N. Manoj, *New J. Chem.*, 2020, 44, 6142–6150.
